# Supplementary material for: A metagenomic analysis of the wrackbed microbiome indicates a phylogeographic break along the North Sea - Baltic Sea transition zone
Source: bioRxiv or medRxiv preprint supplement (doi:10.1101/2021.11.01.466799), 2021-11-01

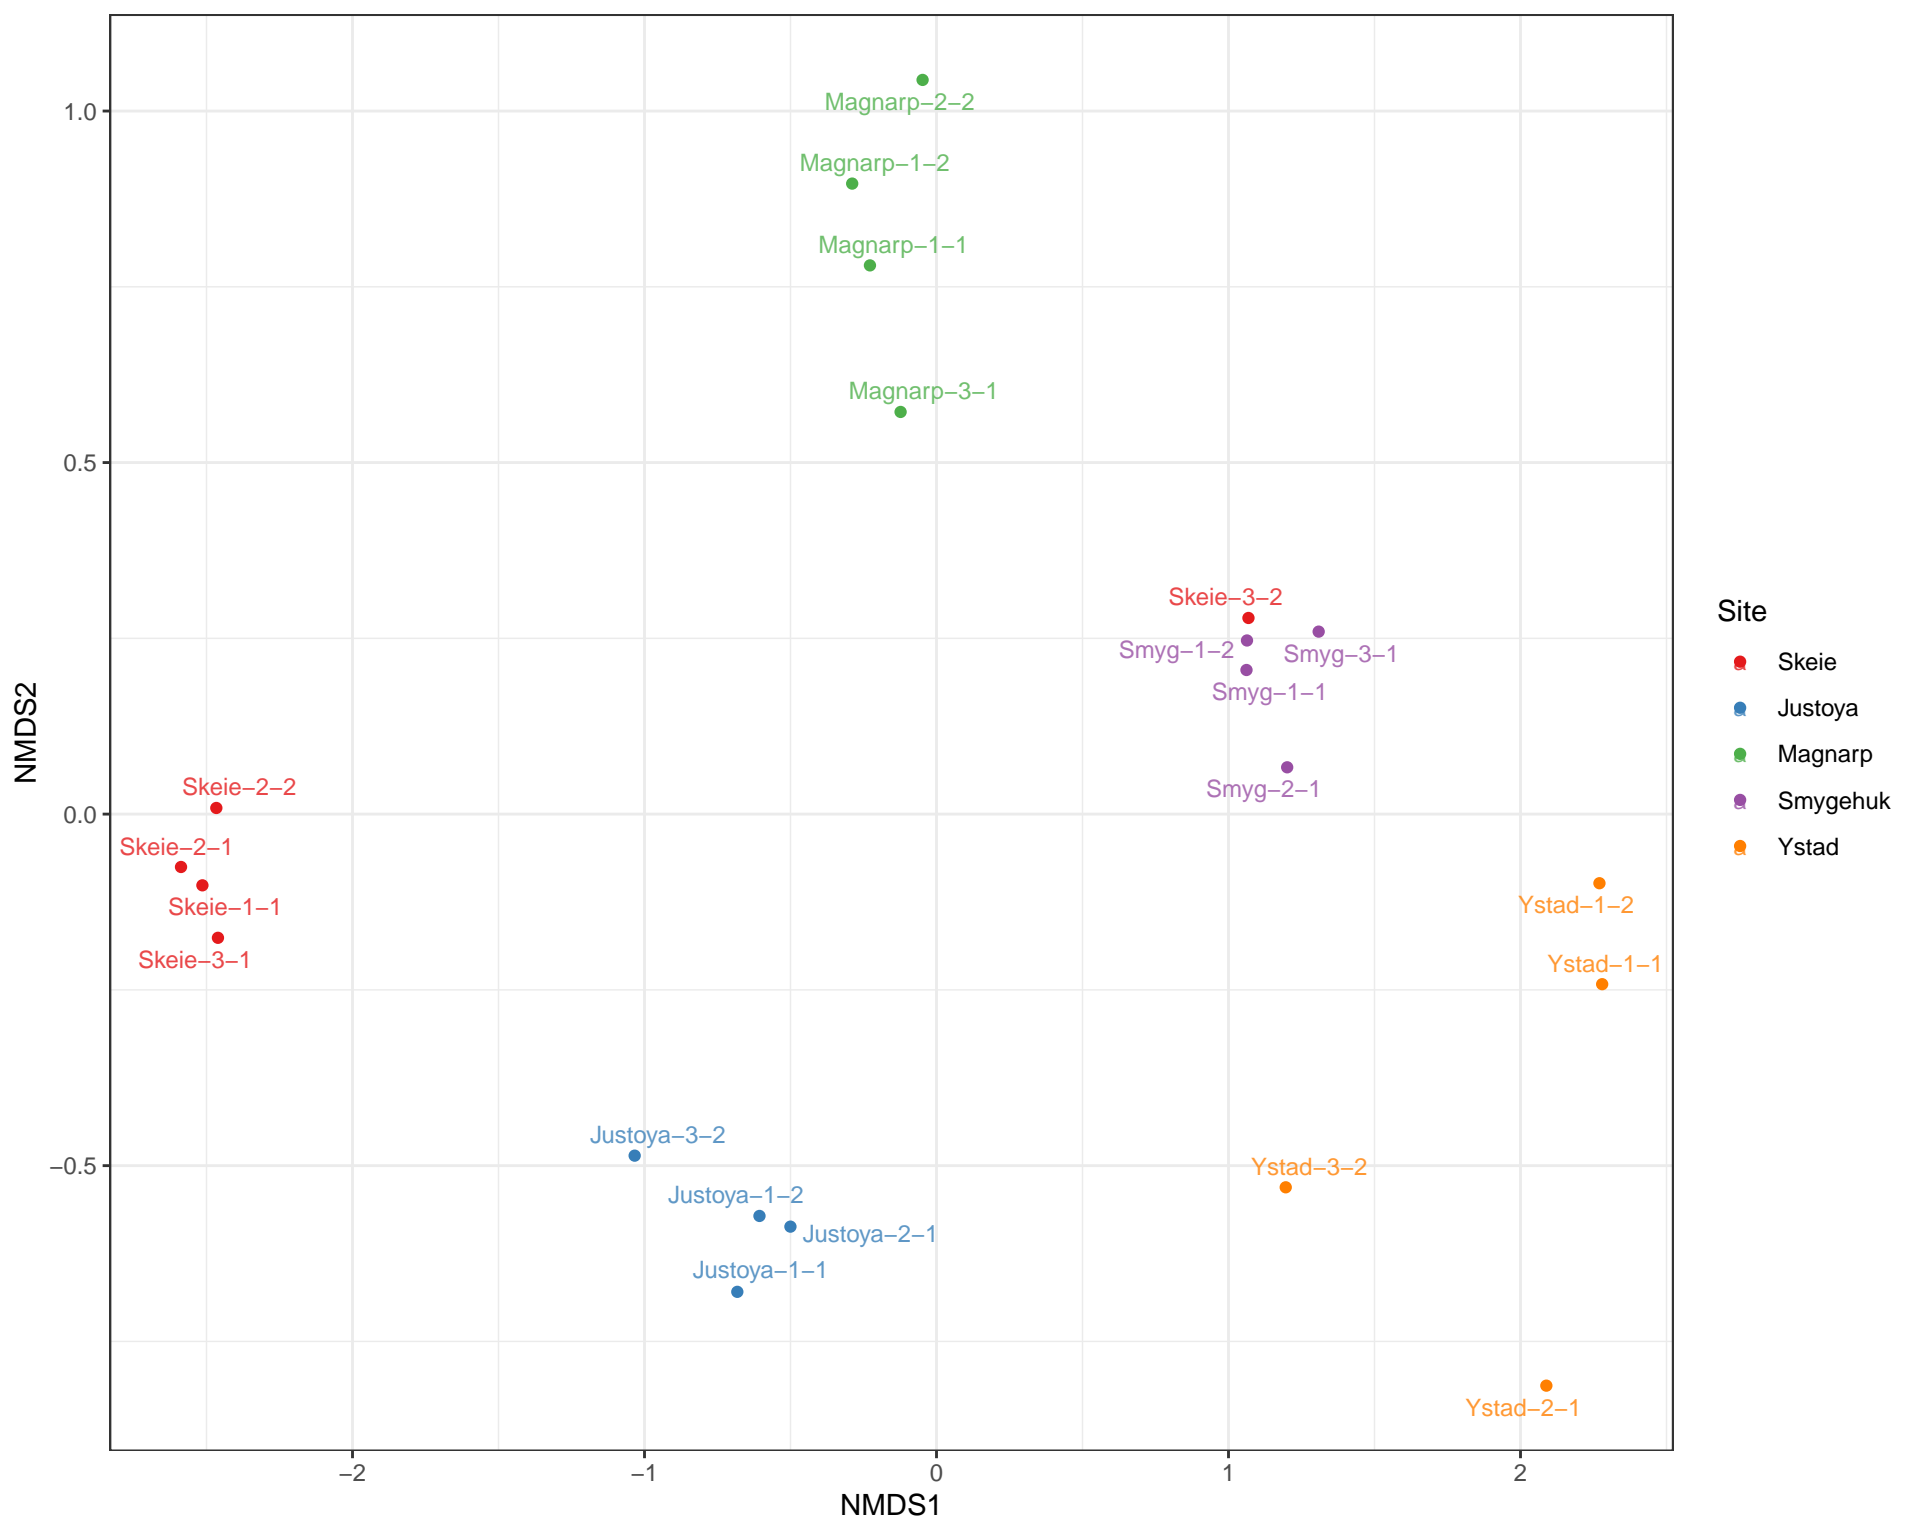

Supplement: Supplementary file [file media-12.pdf]
